# Supplementary material for: A Specific Carbohydrate Diet Virtual Teaching Kitchen Curriculum Promotes Knowledge and Confidence in Caregivers of Pediatric Patients with Inflammatory Bowel Disease
Source: MDPI journal article supplement (doi:10.3390/nu15183999), 2023-09-15
Supplement: s1 [file s1]

SUPPLEMENTAL TABLE 1 (Table S1): Pre- and Post-survey exploring knowledge and perspectives

|                                                                                   | Strongly Disagree | Disagree | Agree | Strongly Agree |
|-----------------------------------------------------------------------------------|-------------------|----------|-------|----------------|
| I know how to determine legal vs illegal SCD foods                                | 1                 | 2        | 3     | 4              |
| I understand how to liberalize SCD                                                | 1                 | 2        | 3     | 4              |
| I understand what nutritional supplements may be needed for my child while on SCD | 1                 | 2        | 3     | 4              |
| I understand the science behind how SCD works for IBD                             | 1                 | 2        | 3     | 4              |
| I feel <b>confident</b> preparing SCD yogurt                                      | 1                 | 2        | 3     | 4              |
| I feel <b>motivated</b> to prepare SCD- legal meals/snacks                        | 1                 | 2        | 3     | 4              |
| I feel <b>confident</b> in preparing SCD- legal meals/snacks                      | 1                 | 2        | 3     | 4              |
| I feel <b>knowledgeable</b> about preparing SCD-legal meals/snacks                | 1                 | 2        | 3     | 4              |
| I have the <b>skills</b> necessary to prepare SCD legal meals/snacks              | 1                 | 2        | 3     | 4              |
| I face <b>barriers</b> when it comes to preparing SCD- legal meals/snacks         | 1                 | 2        | 3     | 4              |

SUPPLEMENTAL TABLE 2 (Table S2): Curriculum Lesson Plan

| Amount of Time | Tools                                                                          | Learning Activity                         | Presenter     |
|----------------|--------------------------------------------------------------------------------|-------------------------------------------|---------------|
| (10 min)       | *Add pre-survey link to chat<br>*Slides for intro<br>*Chat for word cloud      | Pre-Survey<br>Introduction<br>Word Cloud  | “insert name” |
| (13 min)       | *SCD primer video                                                              | SCD PRIMER                                |               |
| (10 min)       | *Nutrition Adequacy Video                                                      | Nutritional Adequacy                      |               |
| (3 min)        | Q&A from chat                                                                  | Q&A/ Break                                |               |
| (14 min)       | Cracker Video (4m)<br>Muffin Video (6m)<br>Sausage Video (4m)                  | Recipe Videos                             |               |
| (3 min)        | Q&A from chat                                                                  | Q&A/ Break                                |               |
| (16 min)       | *The Science Behind SCD video                                                  | Science behind SCD                        |               |
| (7 min)        | *Dairy Video                                                                   | Yogurt Video                              |               |
| (5 min)        | Quiz Slide                                                                     | Yogurt Quiz                               |               |
| (9 min)        | *Add post-survey link to chat<br>*Slides for resources<br>*Chat for word cloud | Post- survey<br>Reflections<br>Word cloud |               |

SUPPLEMENTAL TABLE 3 (Table S3)- Additional topics for future SCD-cooking videos

|                                                                                                                                                                                                                                                                           |
|---------------------------------------------------------------------------------------------------------------------------------------------------------------------------------------------------------------------------------------------------------------------------|
| Kid friendly<br>Easy to make<br>On the go<br>Allergen specific (ex Nut free or Dairy free)<br>Breakfast<br>Family style dinners<br>Snacks<br>Smoothies<br>Meal planning<br>Eating Out<br>Travel<br>Where to find SCD legal ingredients<br>Organization of SCD ingredients |
|---------------------------------------------------------------------------------------------------------------------------------------------------------------------------------------------------------------------------------------------------------------------------|
